# Supplementary material for: Localization and functional analysis of the LARGE family of glycosyltransferases: significance for muscular dystrophy
Source: Oxford University Press journal article supplement (doi:10.1093/hmg/ddi062), 2005-01-20

### Supplementary Figure 1

Localisation of LARGE-V5 and GYLTL1B-V5 constructs in transfected myotube cultures. Cultures were double labelled with anti-V5 (green channel) and the Golgi marker GM130 (red channel). Co-localisation can be seen in the merged pictures of LARGE wild type (WT) and GYLTL1B. No co-localization was seen with LARGE constructs harboring MDC1D mutations (G1525A and 1999insT). Blue channel = Hoechst 33342 nuclear stain. Scale bar = 20µm.

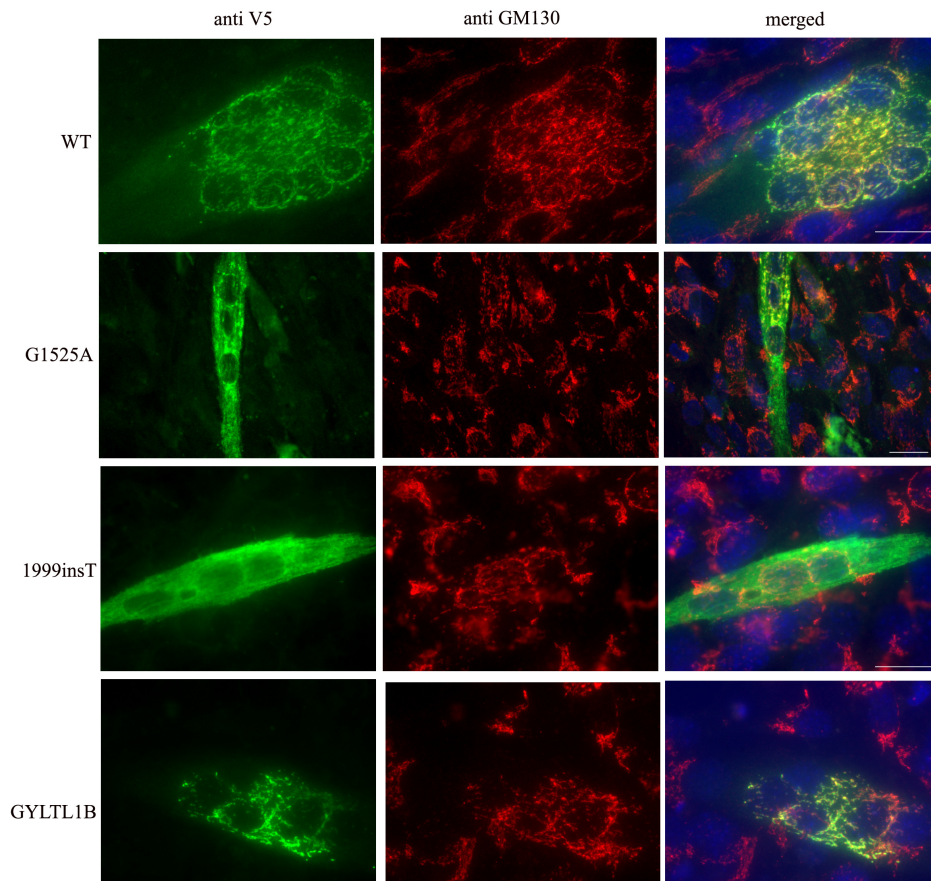

Supplement: ddi062_Supplementary_Data.zip [file ddi062_Supplementary_Data.zip]
