# Supplementary material for: Localization and functional analysis of the LARGE family of glycosyltransferases: significance for muscular dystrophy
Source: Oxford University Press journal article supplement (doi:10.1093/hmg/ddi062), 2005-01-20
Supplement: ddi062_Supplementary_Data.zip [file ddi062_Supplementary_Data.zip]

Archive with 1 entries (1 files):
- Figure_S1.pdf
